# Supplementary material for: Inhibition of polyploidization in Pten‐deficient livers reduces steatosis
Source: PubMed Central journal article supplement — Liver Int. 2022 Sep 2;42(11):2442–52. doi: 10.1111/liv.15384 (PMC9826152; doi:10.1111/liv.15384), 2022-09-02

Supplemental Figure 1

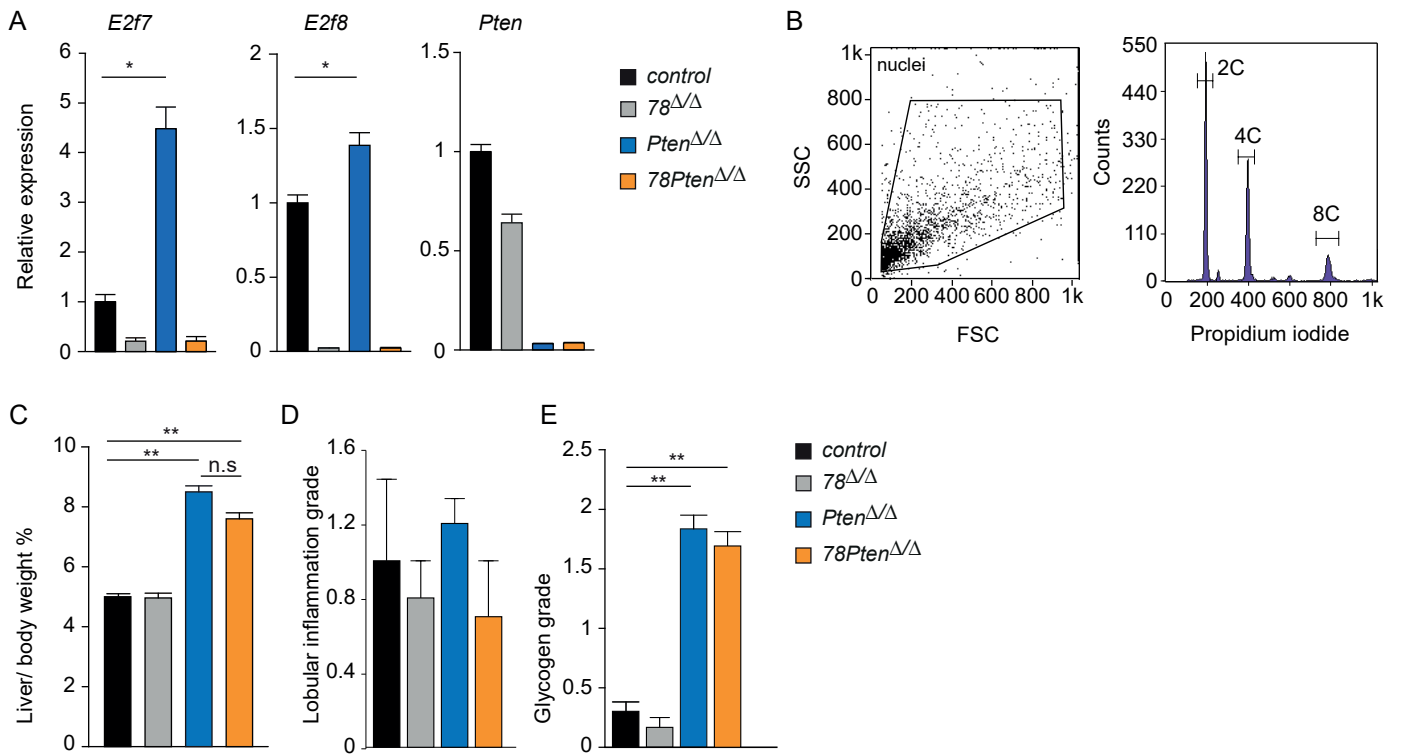

Supplemental Figure 2

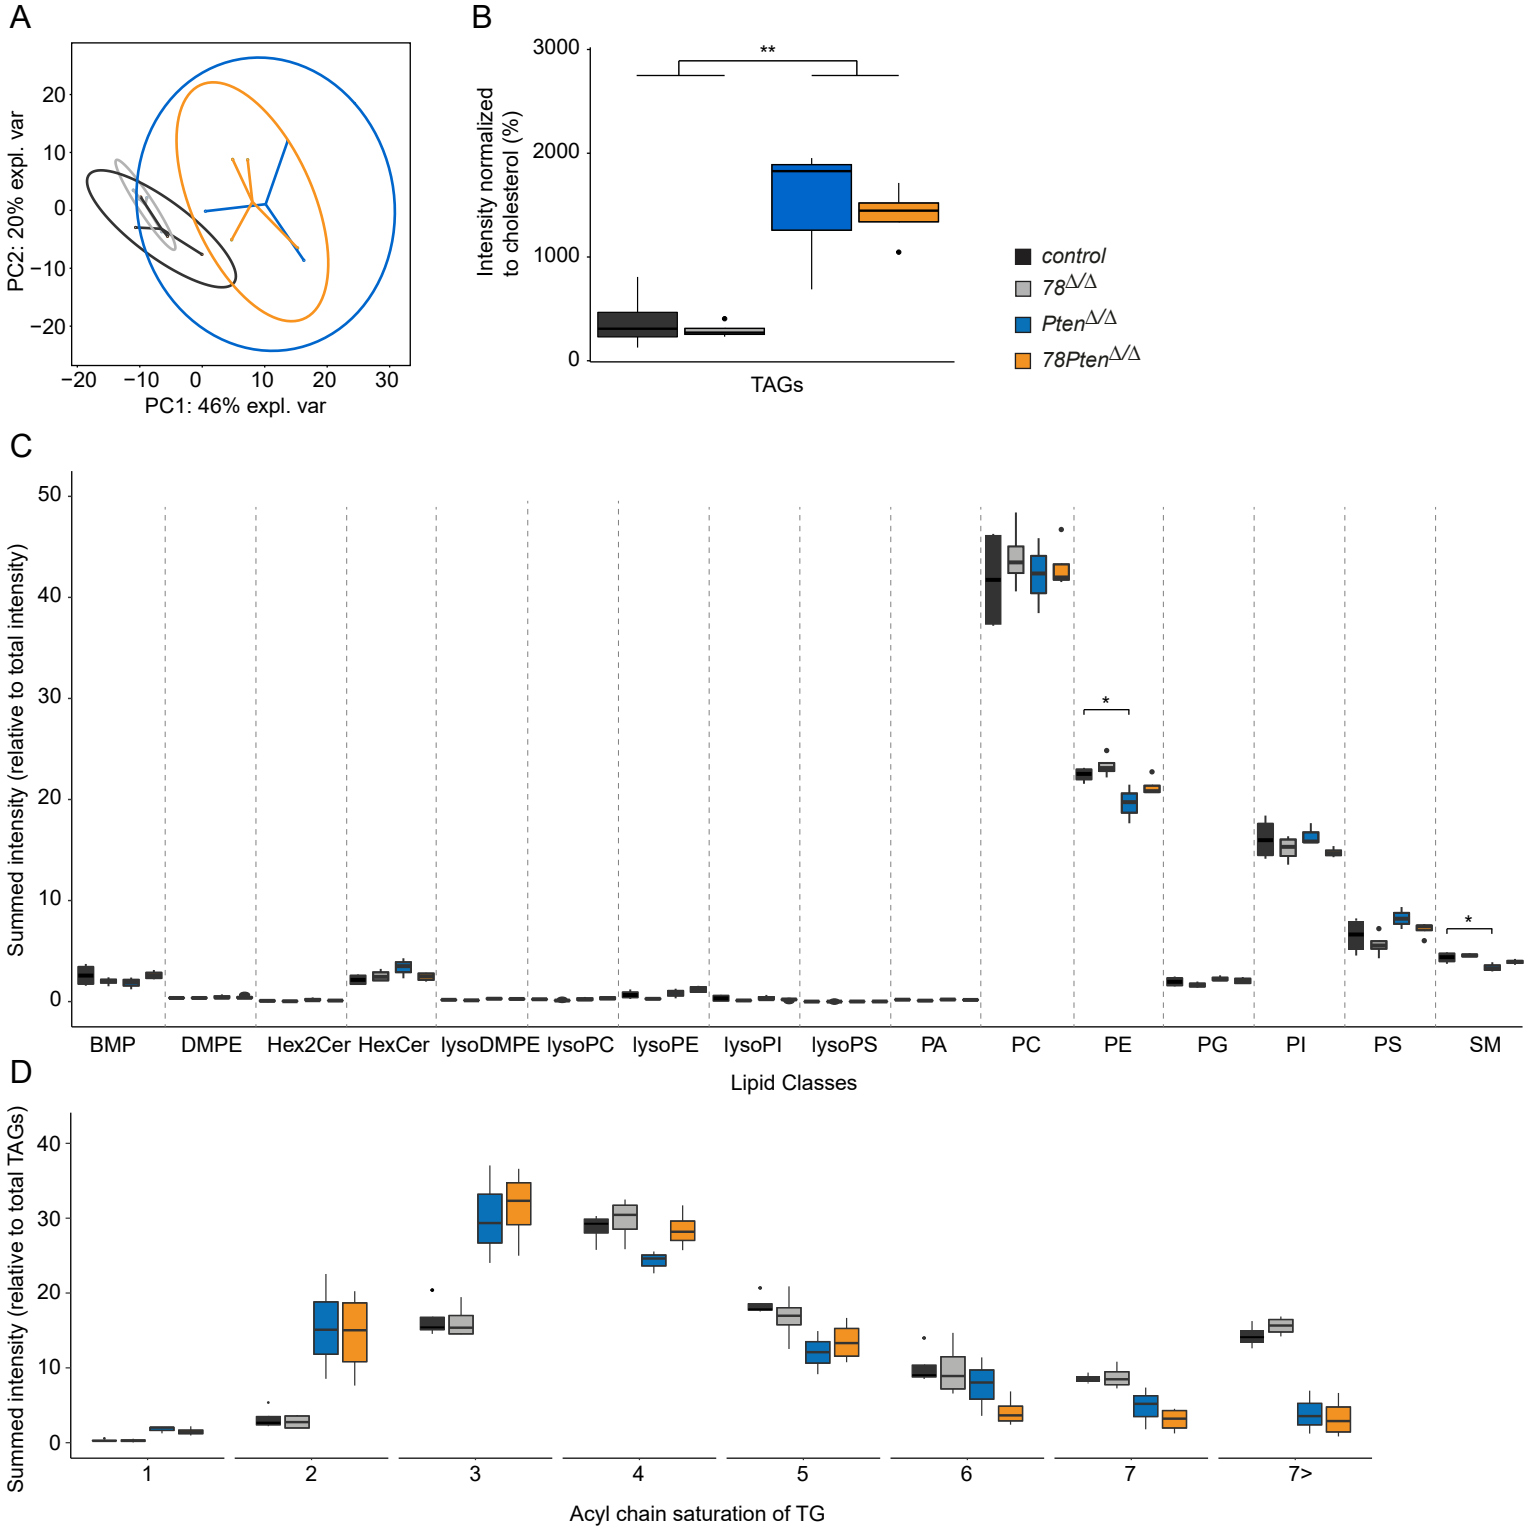

Supplemental Figure 3

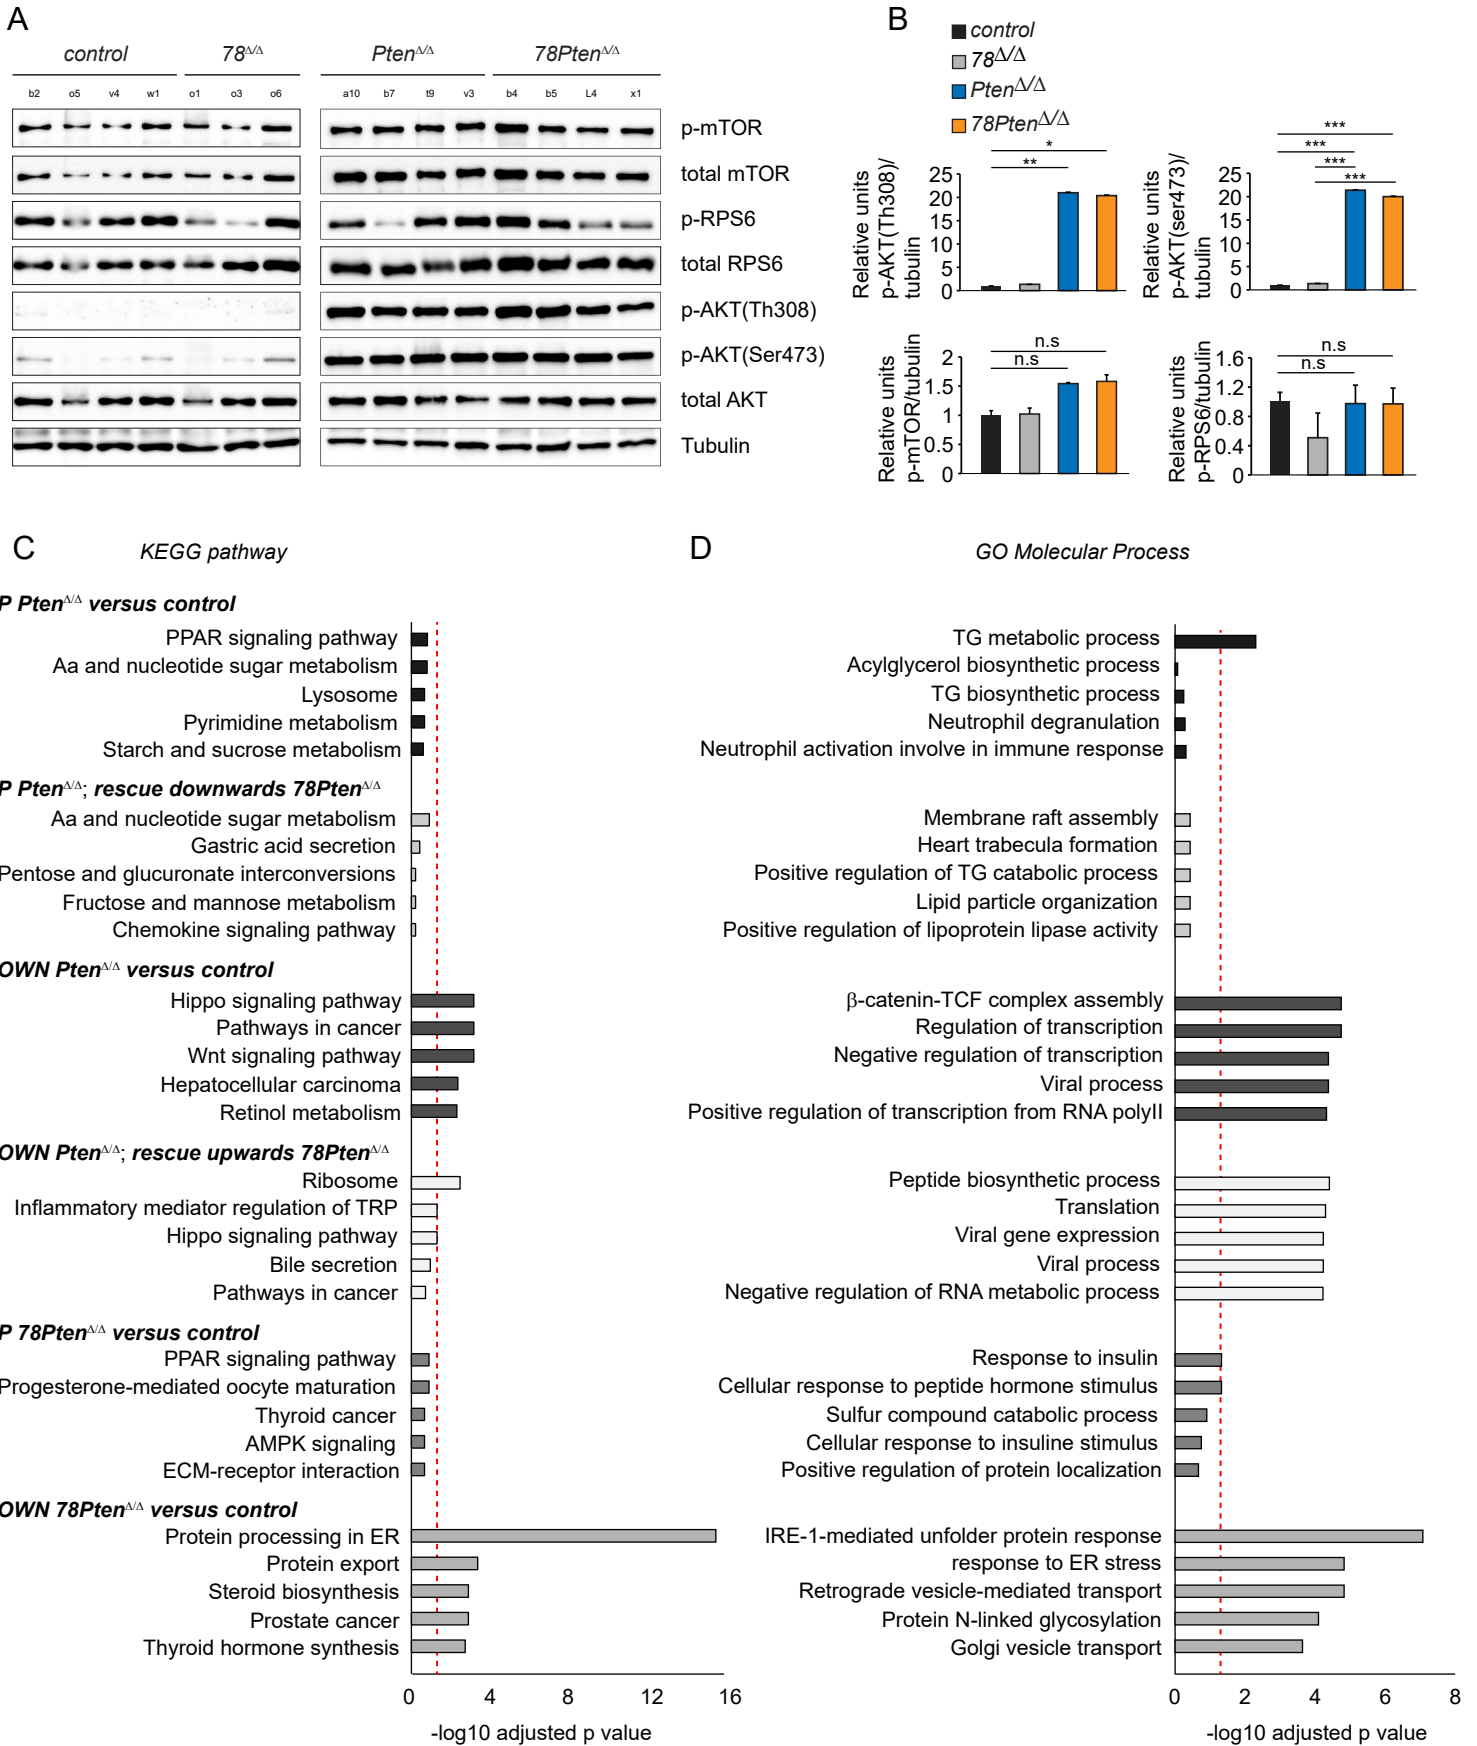

Supplemental Figure 4

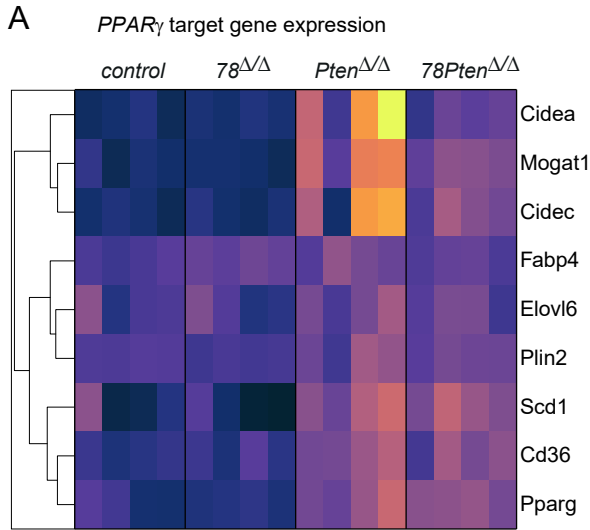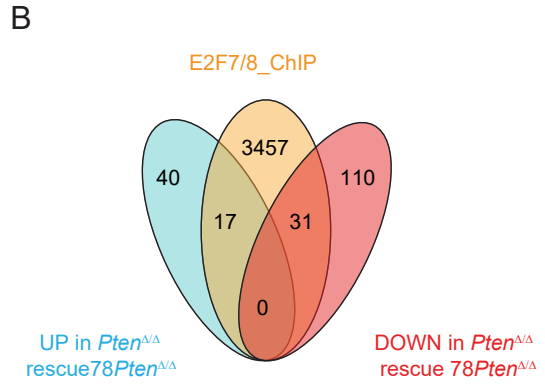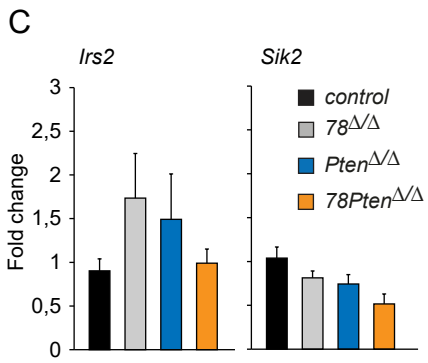

Supplemental Figure 5

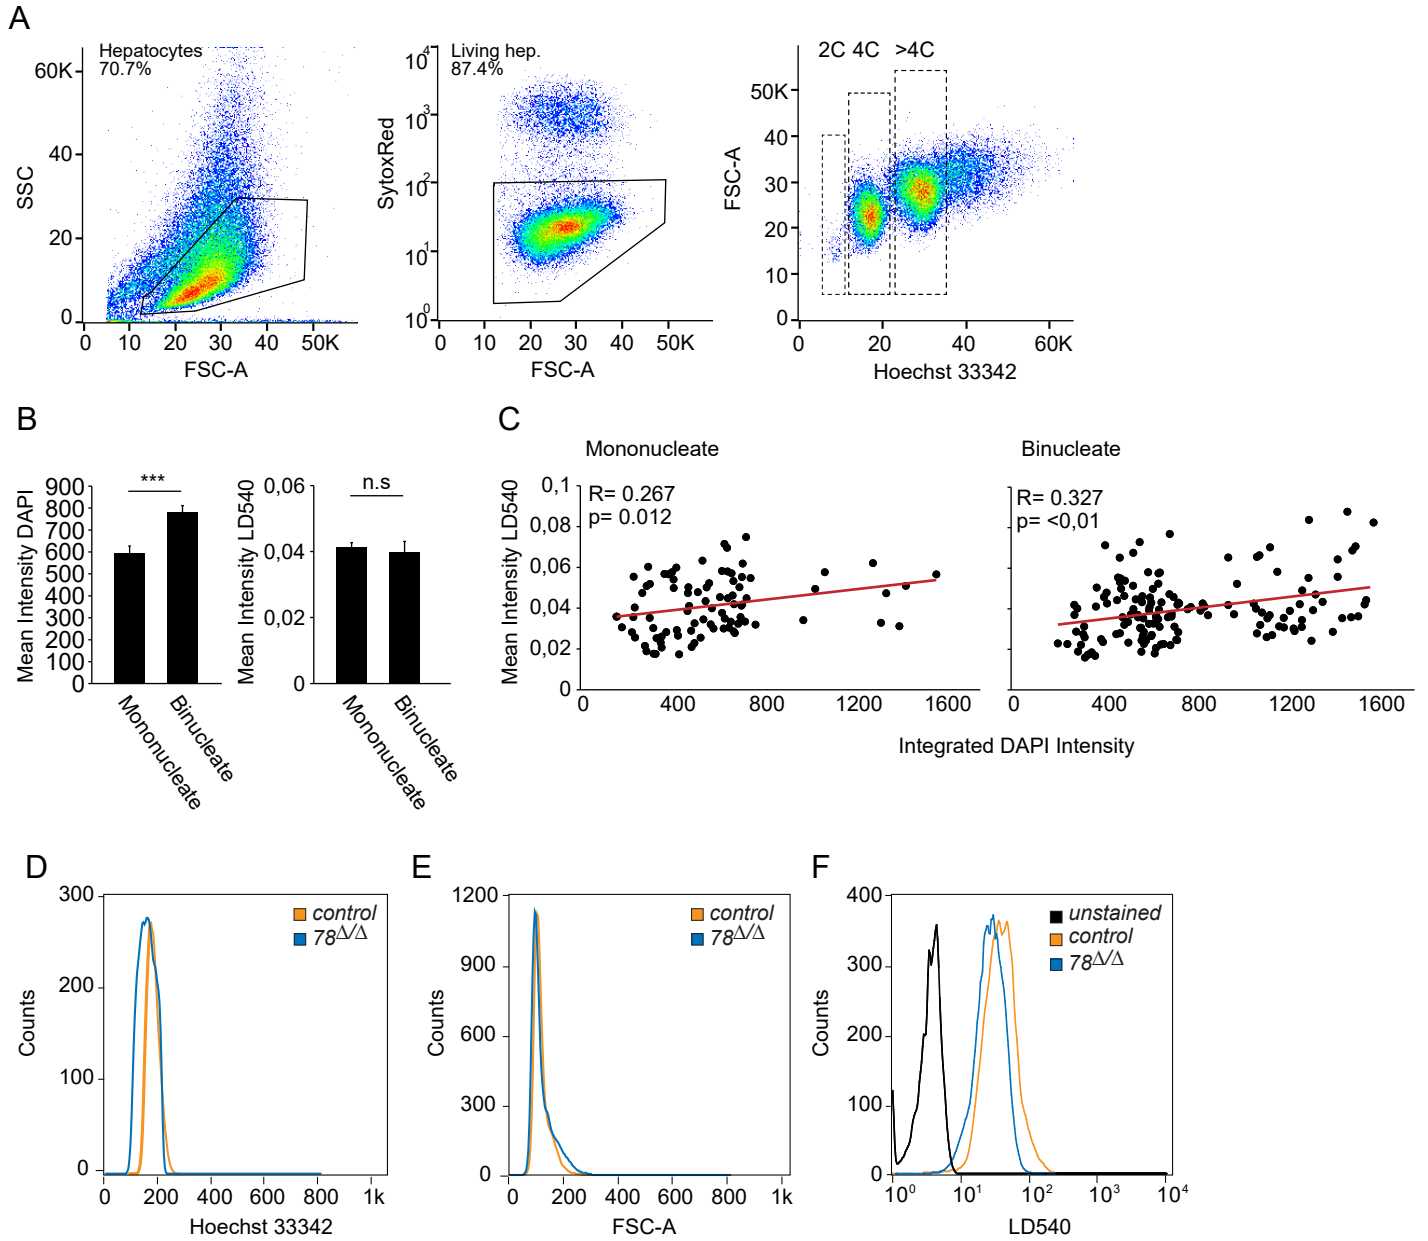

Supplement: LIV-42-2442-s002.pdf [file LIV-42-2442-s002.pdf]
